# Supplementary material for: The Prevalence of Angiostrongylus cantonensis/mackerrasae Complex in Molluscs from the Sydney Region
Source: PubMed Central journal article supplement (PMC4441457; doi:10.1371/journal.pone.0128128), 2015-05-22
Supplement: pone.0128128.s001.pdf [file pone.0128128.s001.pdf]

**Table S1: Complete list of primers used within this study**

| Primer Name | Target   | Sequence (5' – 3')                                                     | Reference              |
|-------------|----------|------------------------------------------------------------------------|------------------------|
| AcanITS1F1  | ITS1     | Forward- 5'-TTCATGGATGGCGAACTGATAG-3'                                  | Qvarnstrom et al. [16] |
| AcanITS1R1  | ITS1     | Reverse - 5' –GCGCCATTGAAACATTATACTT-3'                                | Qvarnstrom et al. [16] |
| AcanITS1P1  | ITS1     | Probe-5' -6-carboxyfluorescein-ATCGCATATCTACTATACGCATGTGACACCTG-BHQ-3' | Qvarnstrom et al. [16] |
| AngioF1674  | ITS1     | Forward – 5'GTCGTAACAAGGTATCTGTAGGTG-3'                                | Qvarnstrom et al. [16] |
| 58SR4       | ITS1     | Reverse - 5' –TAGCTGCGTTTTTTCATCGATA-3'                                | Qvarnstrom et al. [16] |
| AngioF1     | 18S rRNA | Forward – 5'-ATCATAAACCTTTTTTCGAGTATCCAG-3'                            | Qvarnstrom et al. [15] |
| AngioR1     | 18S rRNA | Reverse – 5' -TCTCGAGACAGCTCAGTCCCGG-3'                                | Qvarnstrom et al. [15] |
| NEM2F       | 18S rRNA | Forward- 5'-GCGGTTAAAAAGCTCGTAGTTGG-3'                                 | Qvarnstrom et al. [15] |
| NEM2R       | 18S rRNA | Reverse-5'-CCAACTACGAGCTTTTTAACCGC-3'                                  | Qvarnstrom et al. [15] |
| NEM3F       | 18S rRNA | Forward- 5' - GCGGCTTAATTTGACTCAACAC-3'                                | Qvarnstrom et al. [15] |
| NEM3R       | 18s rRNA | Reverse-5'-GTGTTGAGTCAAATTAAGCCG-3'                                    | Qvarnstrom et al. [15] |
| F-573       | 18S RNA  | Forward- 5'-CGCGGTAATTCCAGCTCCA- 3'                                    | Hadziavdic et al. [26] |
| R-1200      | 18S RNA  | Reverse- 5' - CCCGTGTTGAGTCAAATTAAGC-3'                                | Hadziavdic et al. [26] |
